# Supplementary material
Source: publisher figshare collection journal article supplement (https://gsajournals.figshare.com/ndownloader/files/23021744)
Supplement: Supplementary file 1 [file 23021744]

**Supplymentary Table S2**. Contents of anthocyanins and catechins of ZJ and YK

| **Compound** | **ZJ** (mg/g) | **YK** (mg/g) |
| --- | --- | --- |
| EGC（mg/g） | 21.94±1.25* | 42.15±4.65 |
| C（mg/g） | 1.55±0.42 | 2.67±0.87 |
| EC（mg/g） | 6.501±0.13* | 2.70±0.73 |
| EGCG（mg/g） | 24.39±12.49* | 47.11±7.90 |
| ECG（mg/g） | 18.079±1.84* | 25.76±3.96 |
| Total Catechins（mg/g） | 72.449±5.44* | 120.39±15.33 |
| Delphinidin（mg/g） | 0.6545±0.0071* | 0.0956±0.0023 |
| Cyanidin（mg/g） | 5.5793±0.0689* | 1.6887±0.1402 |
| Petunidin（mg/g） | 0.1198±0.0031 | 0.0000±0.0000 |
| Pelargonidin（mg/g） | 0.1235±0.0026* | 0.0376±0.0024 |
| Peonidin（mg/g） | 0.0388±0.0052* | 0.0030±0.0005 |
| Malvidin（mg/g） | 0.0071±0.0006 | 0.0116±0.0026 |
| Total Anthocyanins（mg/g） | 6.5229±0.0822 | 1.8365±0.1424 |

Note: ANOVA results showed as means ± standard deviation (SD) presented as the six independent replicates of each samples. A p value less than 0.05 was considered statistically significant marked ‘*’.
